# Supplementary material for: Facile encapsulation strategy for uniformly-dispersed catalytic nanoparticles/carbon nanofibers toward advanced Zn–air battery
Source: Royal Society of Chemistry journal article supplement (doi:10.1039/d4ta08388a), 2025-01-01
Supplement: d4ta08388a2.pdf [file d4ta08388a2.pdf]

## Supporting information

### Facile encapsulation strategy for uniformly-dispersed catalytic nanoparticle/carbon nanofiber toward advanced Zn-air battery

*Seong Woon Yoon*<sup>†,a,b</sup>, *Dae-Kwon Boo*<sup>†,c,d</sup>, *Hyunmin Na*<sup>c,d</sup>, *Tae Yoen Kim*<sup>a,b</sup>, *Hyunsoo Chang*<sup>a,b</sup>, *Ji Sung Park*<sup>a,b</sup>, *Su-Ho Cho*<sup>e</sup>, *Ji-Won Jung*<sup>d,\*</sup>, *Hyeong Min Jin*<sup>a,b,\*</sup>

<sup>a</sup>Department of Organic Materials Engineering, Chungnam National University, Daejeon 34134, Republic of Korea

<sup>b</sup>Department of Materials Science and Engineering, Chungnam National University, Daejeon 34134, Republic of Korea

<sup>c</sup>School of Materials Science and Engineering, University of Ulsan, Techno Saneop-ro 55 Beon-gil, Nam-gu, Ulsan 44776, Republic of Korea

<sup>d</sup>Department of Materials Science and Engineering, Konkuk University, 120, Neungdong-ro, Gwangjin-gu, Seoul 05029, Republic of Korea

<sup>e</sup>National Nano Fab Center (NNFC), 291 Daehak-ro, Yuseong-gu, Daejeon 34141, Republic of Korea

<sup>†</sup>Contributed equally to this work.

\*Correspondence to: [jwjung4@konkuk.ac.kr](mailto:jwjung4@konkuk.ac.kr); [hyeongmin@cnu.ac.kr](mailto:hyeongmin@cnu.ac.kr)

#### **This file includes:**

Figs. S1 to S18

Table S1 to S3

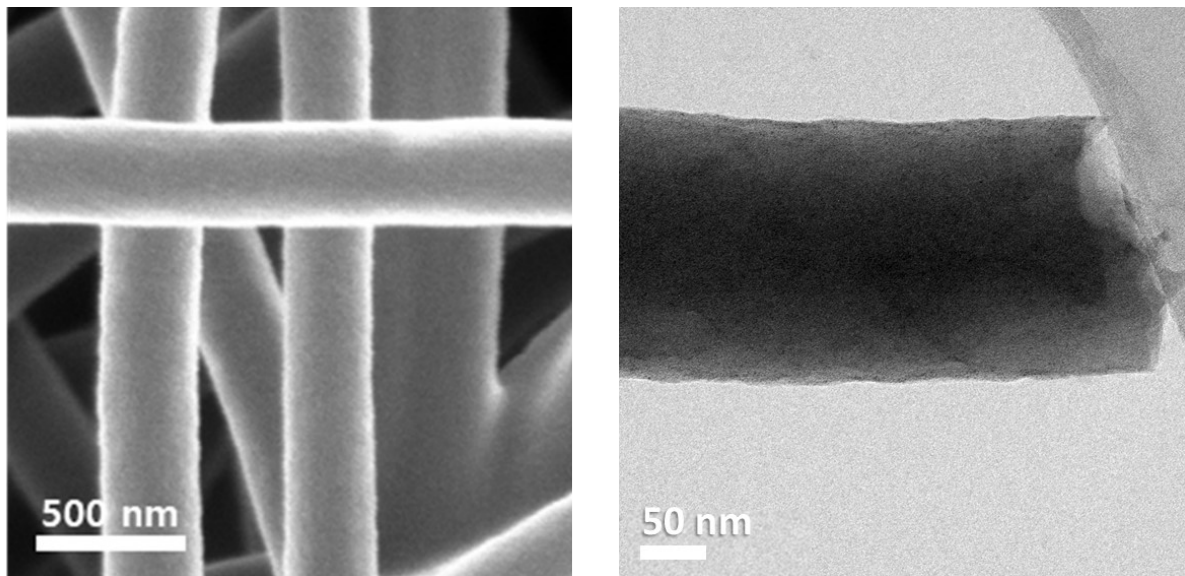

**Fig. S1.** (a) SEM image and (b) TEM image of neat CNF (without P4VP blending) after Ir loading and carbonization.

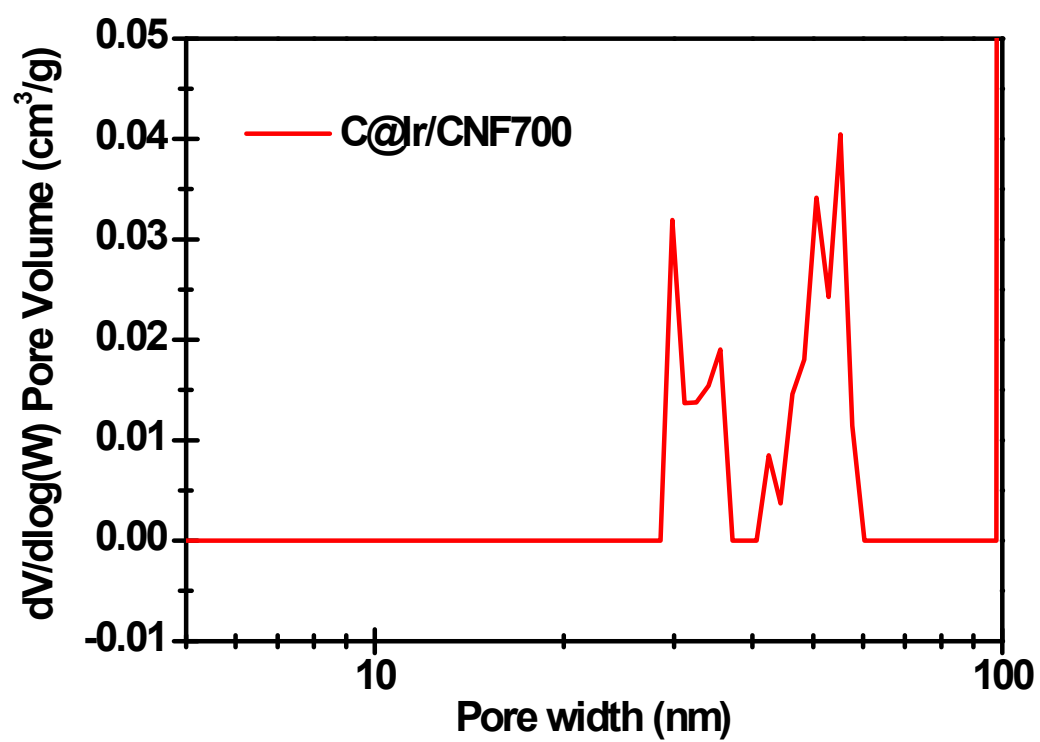

Fig. S2. BJH analysis to evaluate the pore size and volume of C@Ir/CNF700.

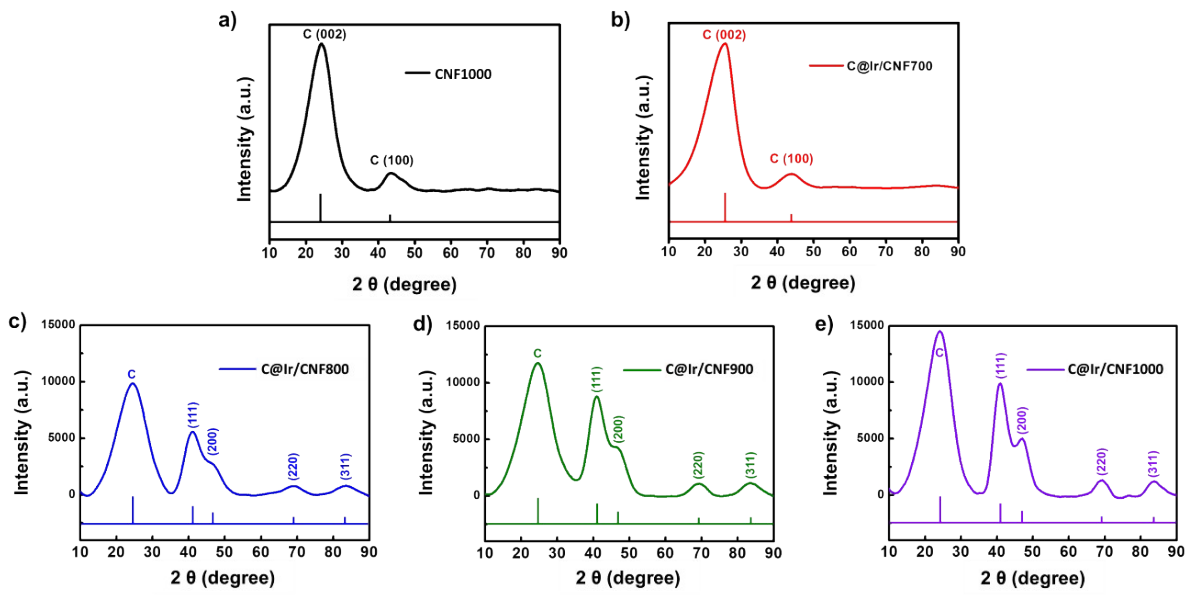

**Fig. S3.** XRD crystal peaks as a function of carbonization temperature for (a) CNF1000 (non-loading CNF sample), (b) C@Ir/CNF700, (c) C@Ir/CNF800, (d) C@Ir/CNF900, and (e) C@Ir/CNF1000.

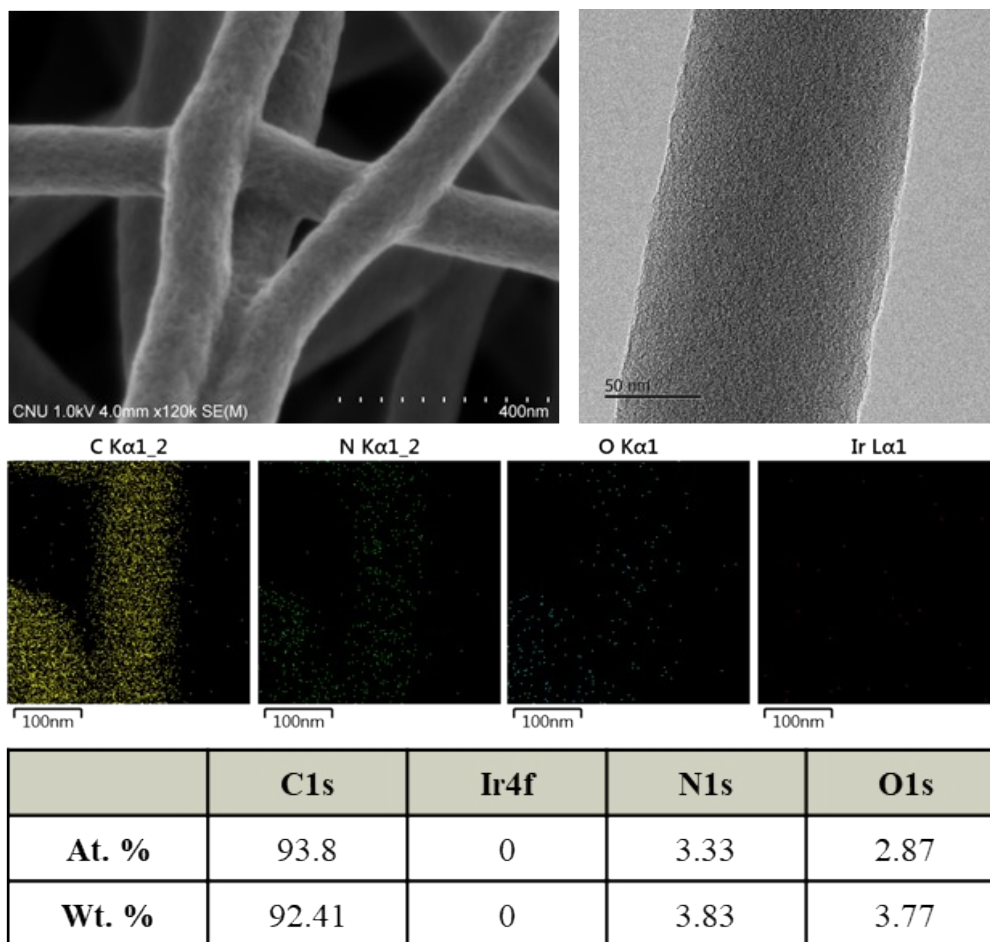

**Fig. S4.** SEM, TEM, EDS, and XPS data of C/CNF1000.

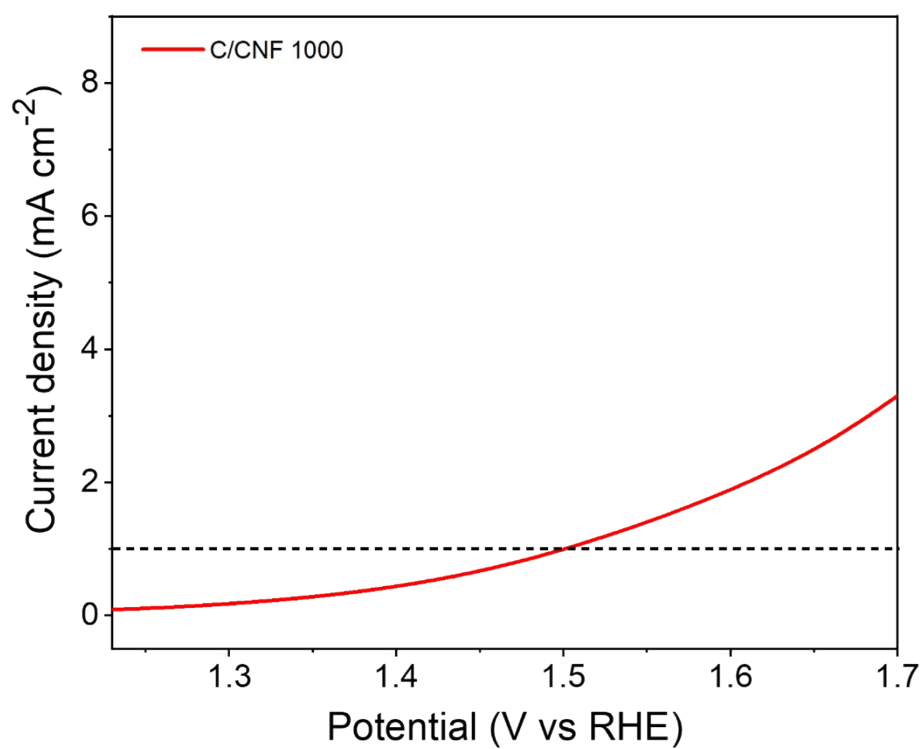

**Fig. S5.** OER-LSV curves of C/CNF1000 in 1 M KOH at a scan rate of 5 mV s<sup>-1</sup> from 1.2 to 1.7 V vs. RHE.

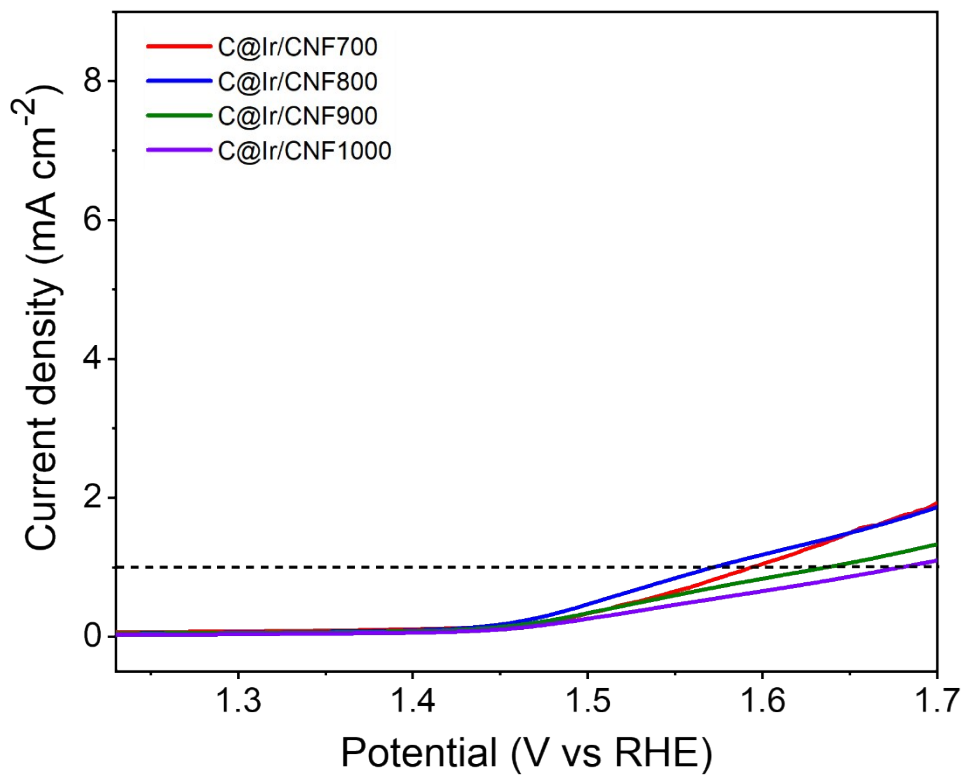

**Fig. S6.** OER-LSV curves of C@Ir/CNF700, C@Ir/CNF800, C@Ir/CNF900, and C@Ir/CNF1000 without CM (Ketjen Black) in 1 M KOH at a scan rate of 5 mV s<sup>-1</sup> from 1.2 to 1.7 V vs. RHE.

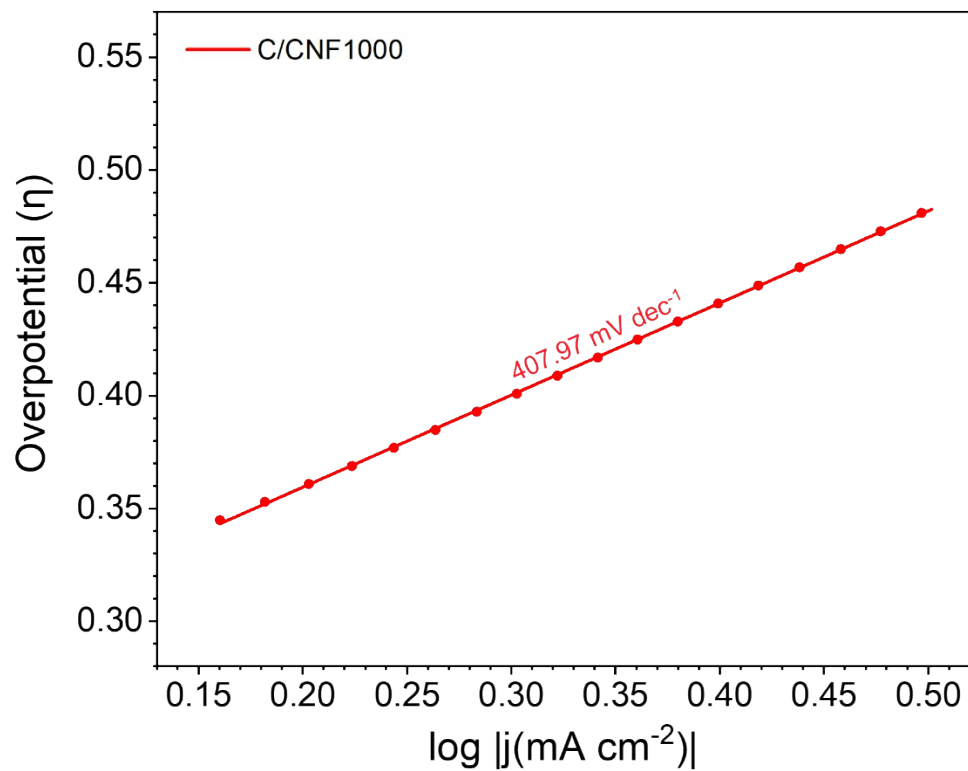

**Fig. S7.** Tafel plots of C/CNF1000 derived from the OER-LSV curves in Fig. S5.



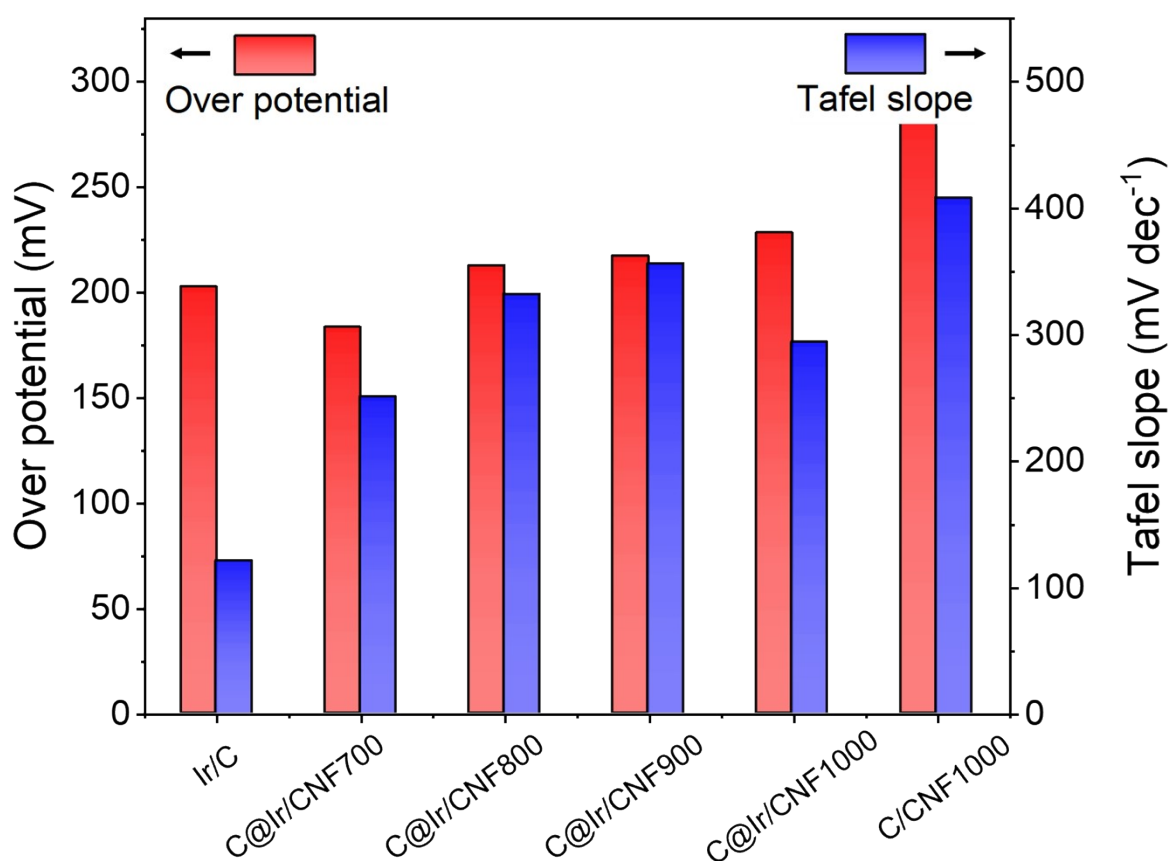

**Fig. S8.** Overpotential and Tafel slope values of Ir/C, C@Ir/CNF700, C@Ir/CNF800, C@Ir/CNF900, C@Ir/CNF1000, and C/CNF1000 from OER-LSV curves in Figures 4b and S5.

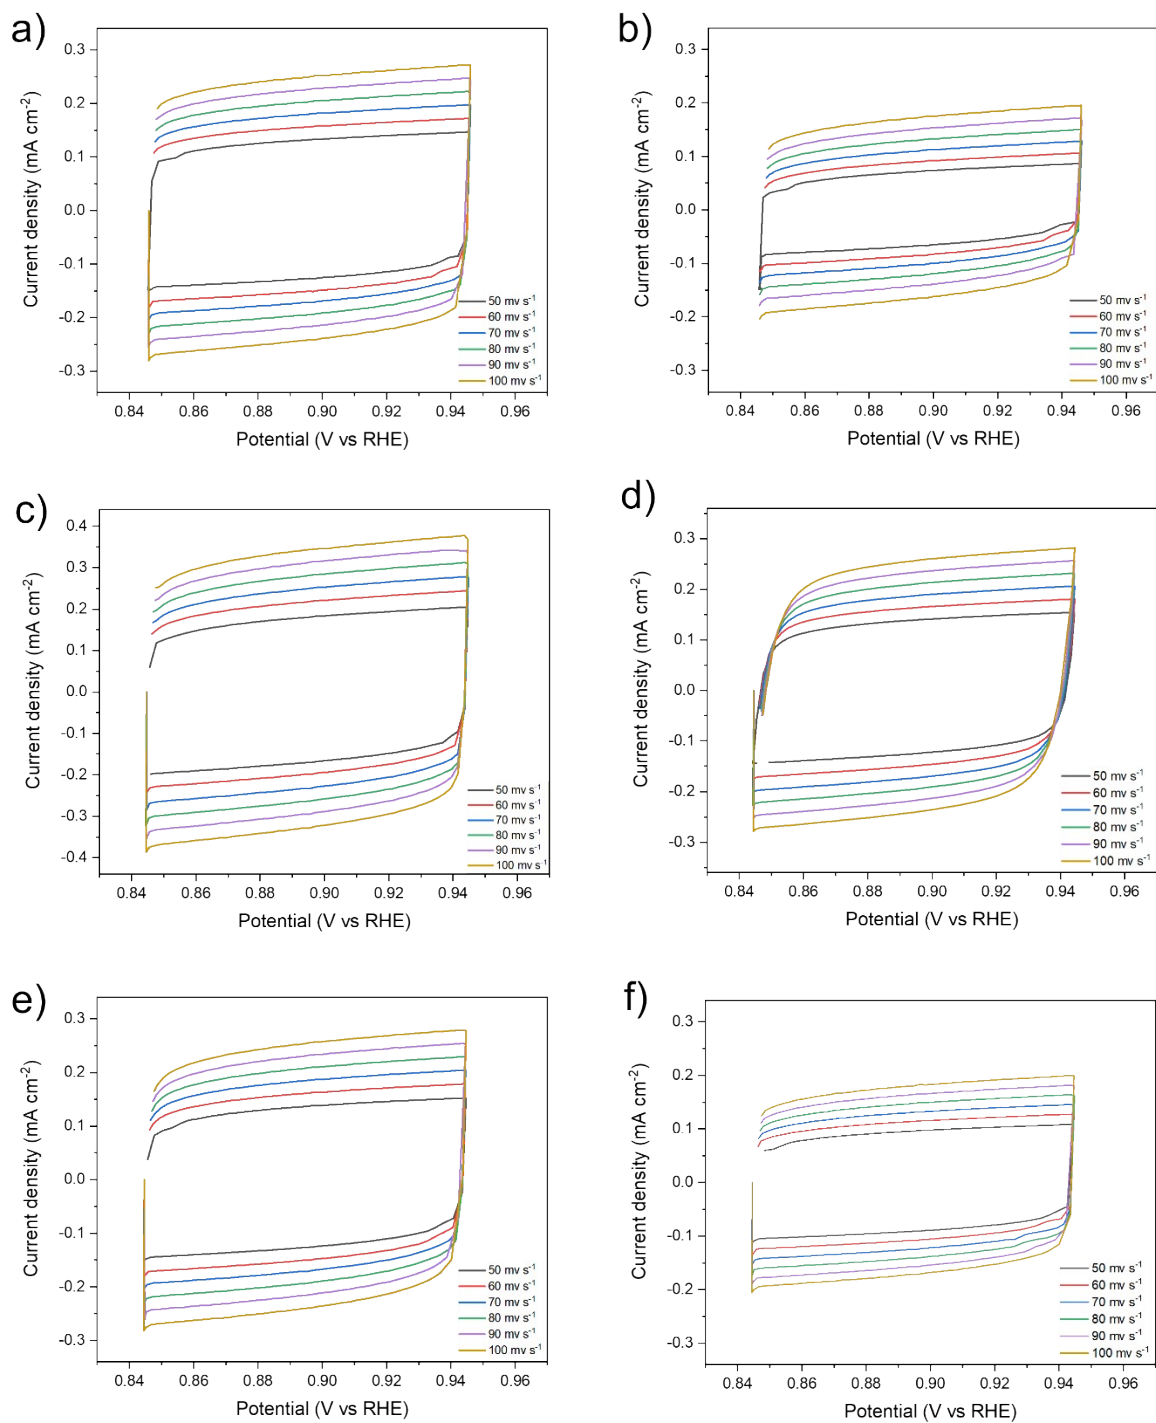

**Fig. S9.** EDLC at various scan rates for (a) Ir/C, (b) C/CNF1000, (c) C@Ir/CNF700, (d) C@Ir/CNF800, (e) C@Ir/CNF900, and (f) C@Ir/CNF1000.

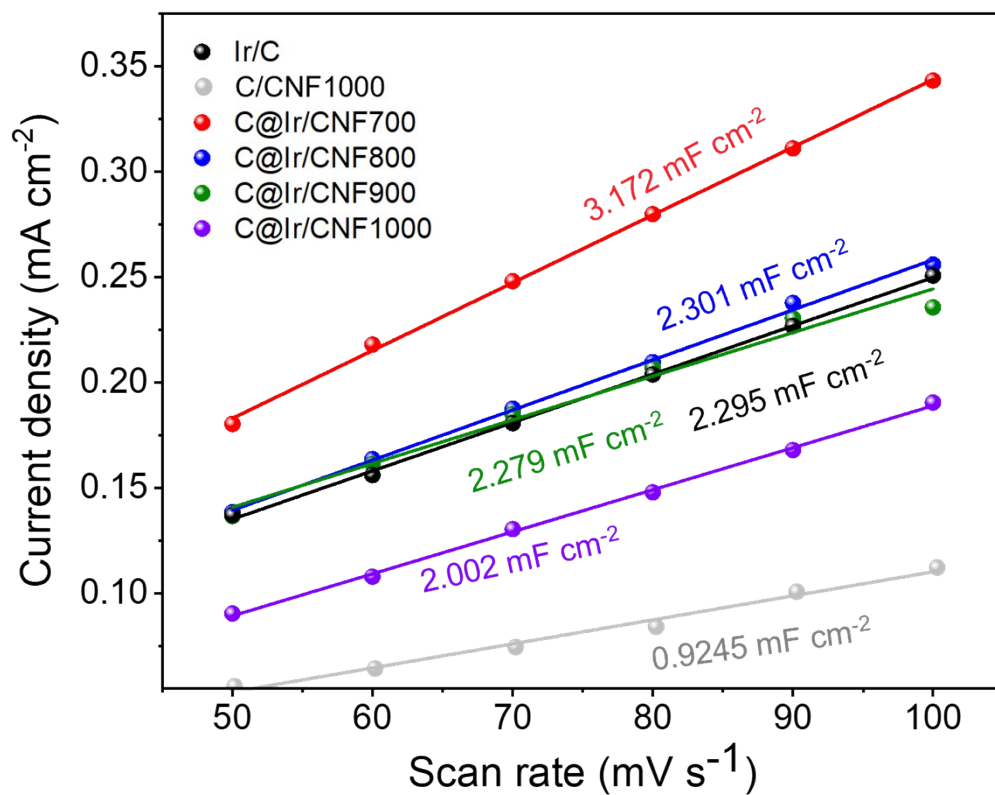

**Fig. S10.** Electrical double layer capacitance (EDLC) as a function of scan rate for C/CNF1000 compared to other C@Ir/CNF samples.

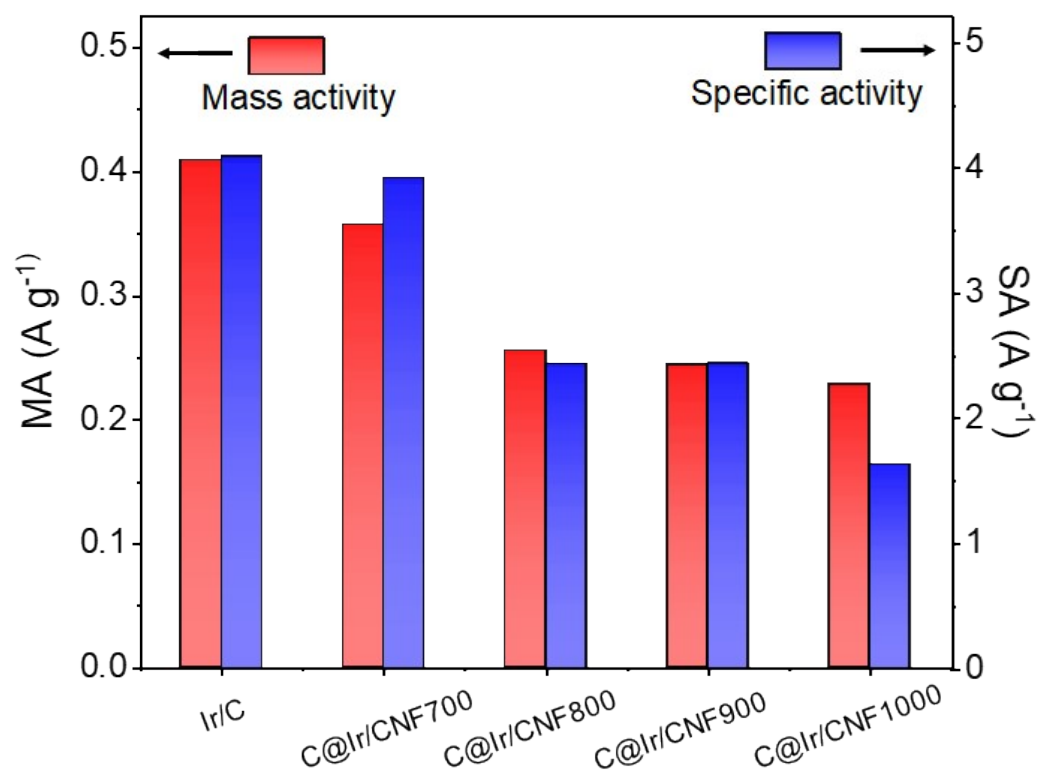

**Fig. S11.** Mass activity and specific activity from OER-LSV curves in Fig. 4b.

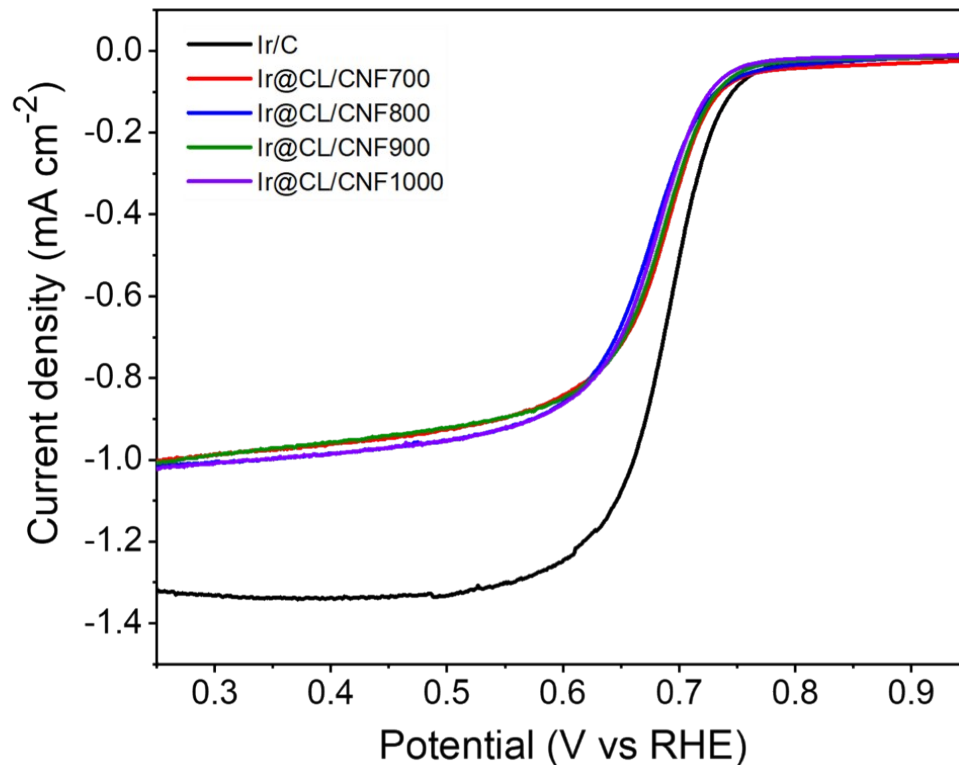

**Fig. S12.** ORR-LSV curves for Ir/C, C@Ir/CNF700, C@Ir/CNF800, C@Ir/CNF900, and C@Ir/CNF1000.

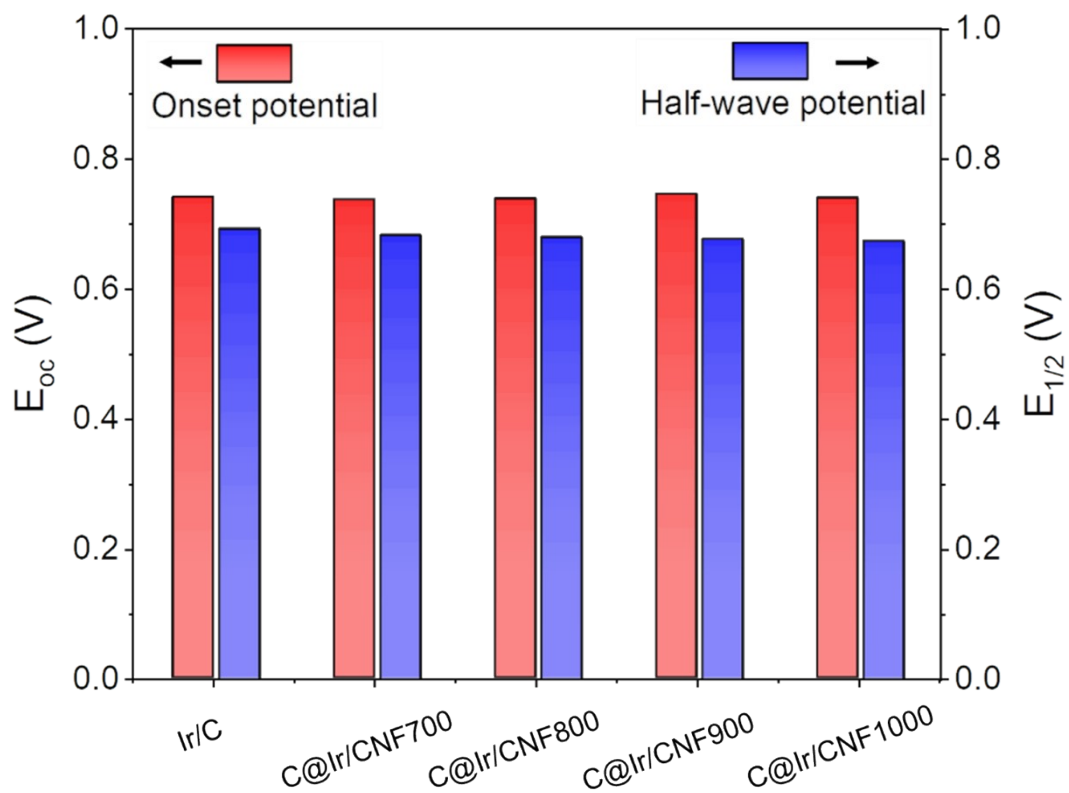

**Fig. S13.** Onset potential and half-wave potential values for Ir/C, C@Ir/CNF700, C@Ir/CNF800, C@Ir/CNF900, and C@Ir/CNF1000.

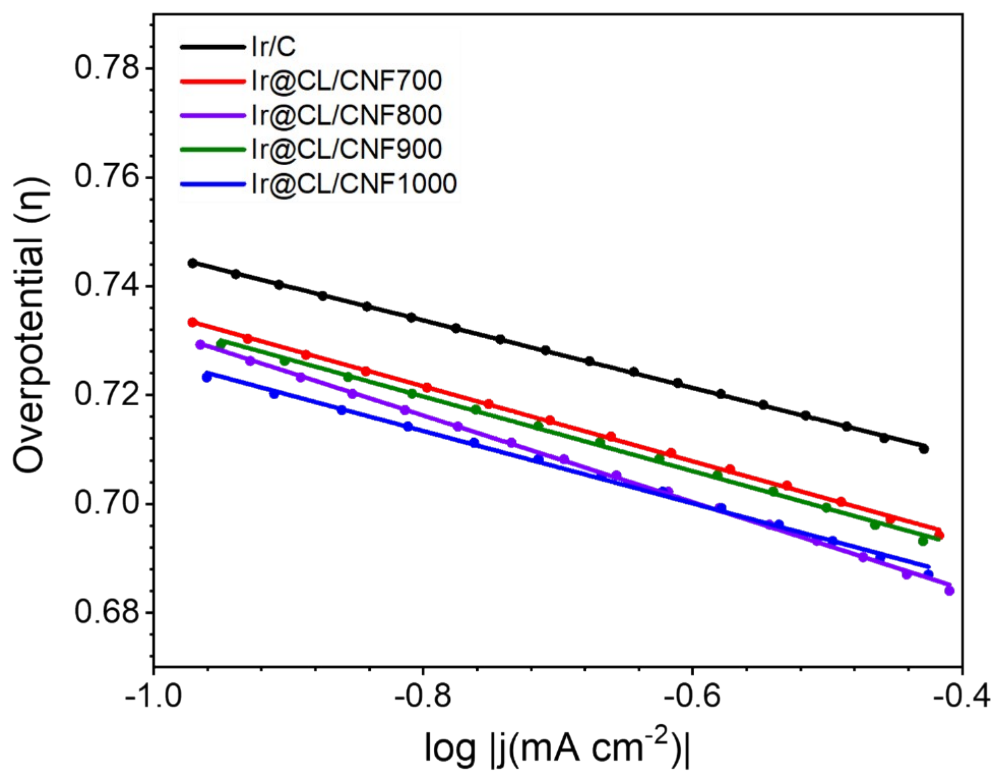

**Fig. S14.** Tafel plots for Ir/C, C@Ir/CNF700, C@Ir/CNF800, C@Ir/CNF900, and C@Ir/CNF1000 from ORR-LSV curves in Fig. S12.

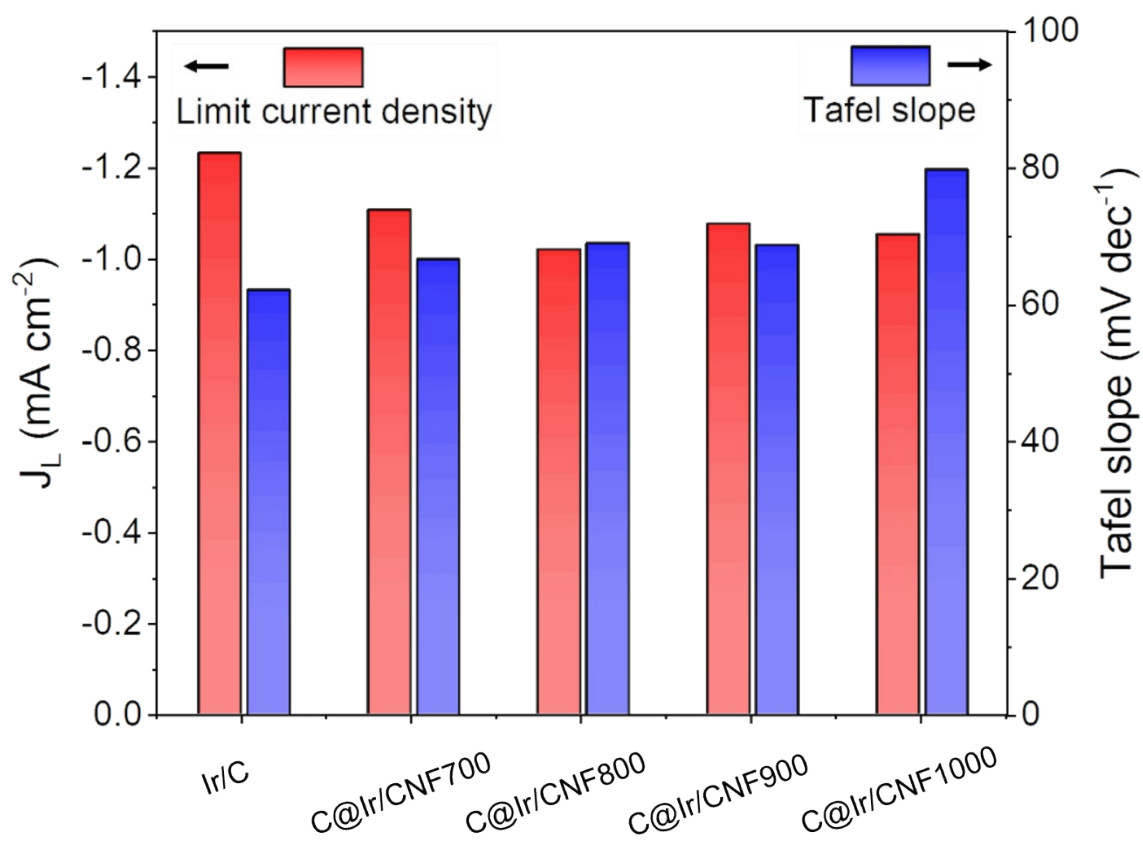

**Fig. S15.** Limit current density and Tafel slope values for Ir/C, C@Ir/CNF700, C@Ir/CNF800, C@Ir/CNF900, and C@Ir/CNF1000 from Figs. S12 and S14.



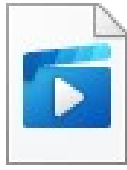

미디어1.mp4

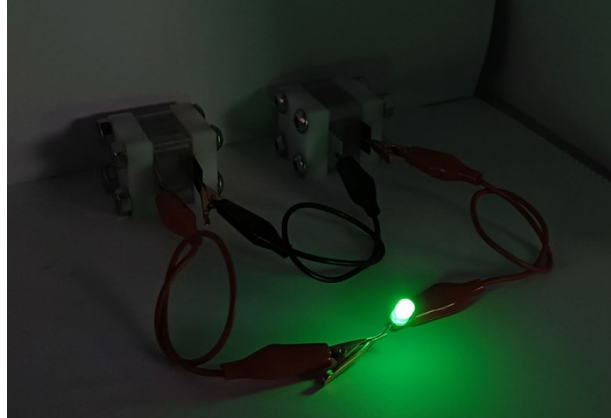

**Fig. S16.** A lighted green light-emitting diode (LED) powered by two series of homemade ZAB with C@Ir/CNF1000: (a) operation video, (b) digital image.

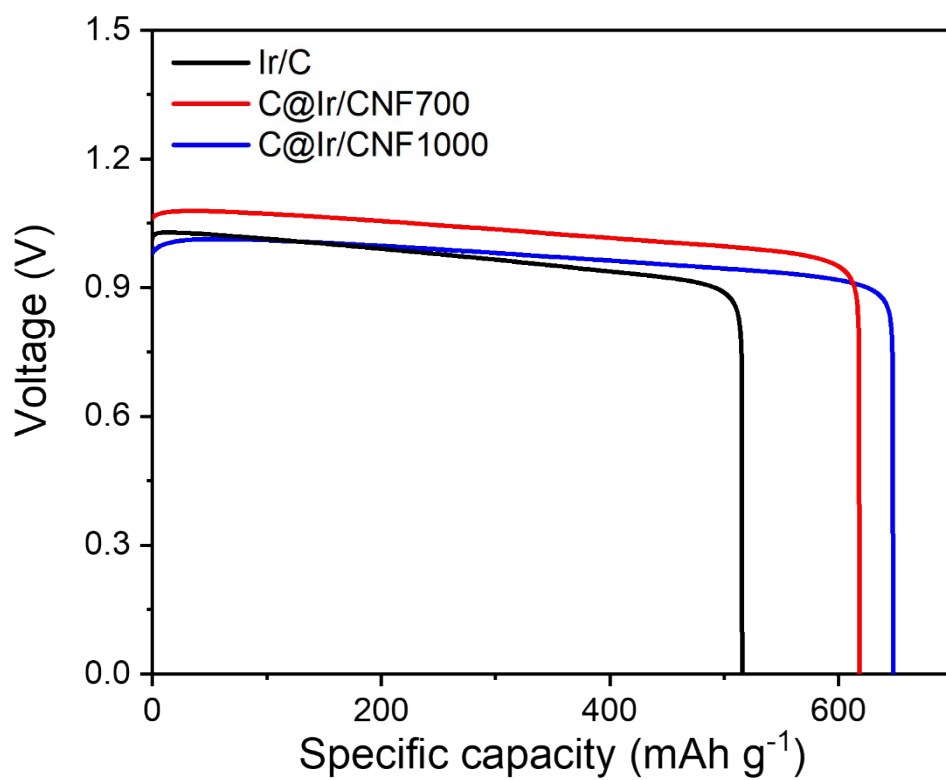

**Fig. S17.** Zn mass-normalized specific capacities at a current density of 25 mA cm<sup>-2</sup>.

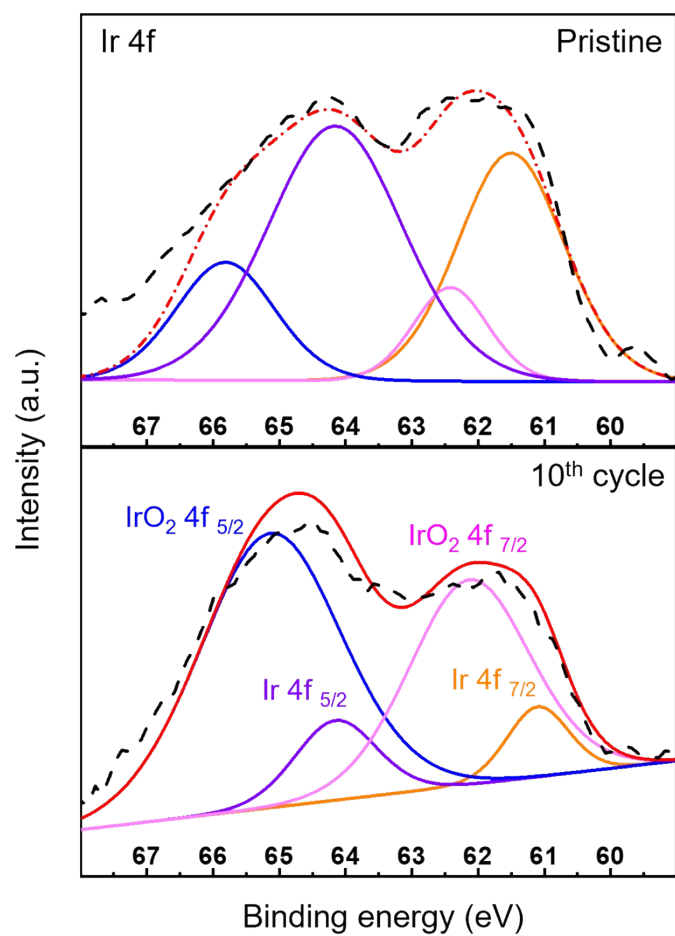

**Fig. S18.** Ir 4f XPS spectrum of the pristine state and after 10<sup>th</sup> cycle air cathode with C@Ir/CNF1000.

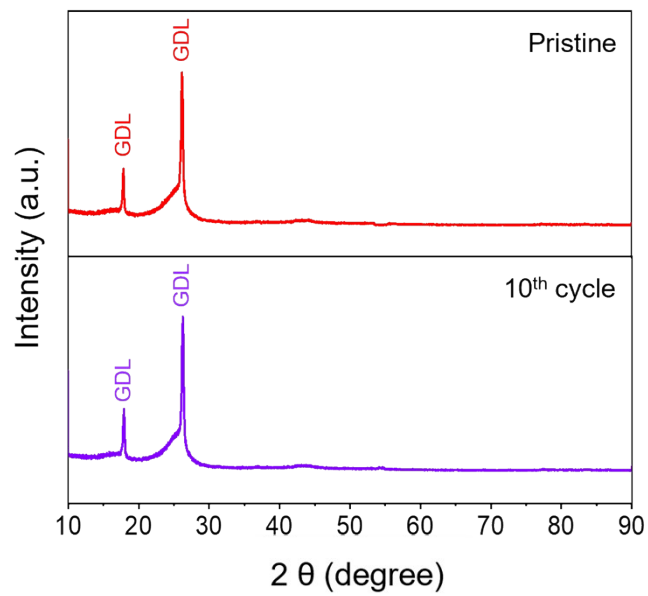

**Fig. S19.** XRD data of the pristine state and after 10<sup>th</sup> cycle air cathode with C@Ir/CNF1000.

**Table S1.** Calculated crystallite sizes using the Scherrer equation

| $D_{hkl} = \frac{K\lambda}{\beta_{hkl}\cos(\theta_{hkl})}$ | $2\theta$ (°) | Reflection Planes | FWHM (radian) | Crystallite size- $D$ (nm) |
|------------------------------------------------------------|---------------|-------------------|---------------|----------------------------|
| C@Ir/CNF800                                                |               |                   | 4.98          | 1.78                       |
| C@Ir/CNF900                                                | 40.9          | (111)             | 4.18          | 2.11                       |
| C@Ir/CNF1000                                               |               |                   | 3.6           | 2.46                       |

**Table S2.** Atomic and weight fractions of elements in C@Ir/CNF700 and C@Ir/CNF1000 from XPS analysis

|              |       | <b>C</b> | <b>Ir</b> | <b>N</b> | <b>O</b> |
|--------------|-------|----------|-----------|----------|----------|
| C@Ir/CNF700  | At. % | 72.47    | 3.69      | 12.76    | 11.08    |
|              | Wt. % | 44.97    | 36.64     | 9.23     | 9.16     |
| C@Ir/CNF1000 | At. % | 88.93    | 4.27      | 2.95     | 3.86     |
|              | Wt. % | 53.62    | 41.20     | 2.07     | 3.10     |

**Table S3.** Comparison of ZAB performance with catalysts from other literature

| Cathode catalyst                                  | Cycling stability<br>(hour (cycle)) | Voltage gap<br>(V)           | Current density<br>(mA cm <sup>-2</sup> ) | Electrolyte                     | Ref       |
|---------------------------------------------------|-------------------------------------|------------------------------|-------------------------------------------|---------------------------------|-----------|
| C@Ir/CNF                                          | 30 h<br>(75 cycles)                 | 0.936 V (0.973 V at the end) | 5 mA cm <sup>-2</sup>                     | 6M KOH + 0.2M ZnAC              | This work |
| FSZAB@Co-SAs/N-C/rGO                              | 26.31 h<br>(78 cycles)              | ≈0.8 V                       | 1 mA cm <sup>-2</sup>                     | 6M KOH + 0.2M ZnAC              | 1         |
| Single atom Ir embedded nitrogen-doped carbon     | 100 h<br>(150 cycles)               | ~1.0 V                       | 5 mA cm <sup>-2</sup>                     | 6M KOH + 0.2M ZnAC              | 2         |
| MnO <sub>2</sub> -NCNT                            | 4 h<br>(50 cycles)                  | increased ≈0.4 V at the end  | 8 mA cm <sup>-2</sup>                     | 6M KOH                          | 3         |
| CoMn <sub>2</sub> O <sub>4</sub> /N-rGO           | 80 h<br>(1200 cycles)               | Increased ≈0.2 V at the end  | 5 mA cm <sup>-2</sup>                     | 6M KOH                          | 4         |
| Co <sub>3</sub> O <sub>4</sub> /carbon nanofibers | 135 h<br>(135 cycles)               | Increased ≈0.08 V at the end | 1 mA cm <sup>-2</sup>                     | 6M KOH + 0.2M ZnCl <sub>2</sub> | 5         |
| Co/NC                                             | 12 h                                | 0.88 V                       | 5 mA cm <sup>-2</sup>                     | 6M KOH                          | 6         |
| 3d-GMC                                            | 200 h<br>(120 cycles)               | ≈0.8 V (≈1.0 V at the end)   | 5 mA cm <sup>-2</sup>                     | 6M KOH + 0.2M ZnAC              | 7         |
| SA-Fe-SNC@900                                     | 160 h<br>(960 cycles)               | 0.75 V (0.84 V at the end)   | 5 mA cm <sup>-2</sup>                     | 6M KOH + 0.2M ZnAC              | 8         |
| CuNCs-CoNCs/NPCF                                  | 20 h<br>(5000 cycles)               | 0.8 V (0.82 V at the end)    | 10 mA cm <sup>-2</sup>                    | 6M KOH + 0.2M ZnAC              | 9         |
| POP-Fe/Ni-900                                     | 120 h<br>(450 cycles)               | ≈0.65 V (≈0.75 V at the end) | 5 mA cm <sup>-2</sup>                     | 6M KOH + 0.2M ZnAC              | 10        |
| NiCu-MoS <sub>2</sub>                             | 133 h<br>(400 cycles)               | 0.71 V (0.74 V at the end)   | 5 mA cm <sup>-2</sup>                     | 6M KOH + 0.2M ZnAC              | 11        |
| Fe <sub>3</sub> Co-NC@900                         | 675 cycles                          | 0.898 V (1.045 V at the end) | 10 mA cm <sup>-2</sup>                    | 6M KOH + 0.02 M ZnAC            | 12        |
| Fe-SA@NC-2                                        | 60 h                                | 0.8 V at the end             | 1 mA cm <sup>-2</sup>                     | 6M KOH + 0.2M ZnAC              | 13        |

## Supporting information references

1. L. Li, N. Li, J. Xia, S. Zhou, X. Qian, F. Yin, G. He and H. Chen, *J. Mater. Chem. A*, 2023, **11**, 2291-2301.
2. X. Luo, M. Yang, W. Song, Q. Fang, X. Wei, L. Jiao, W. Xu, Y. Kang, H. Wang, N. Wu, W. Gu, L. Zheng, L. Hu and C. Zhu, *Adv. Funct. Mater.*, 2021, **31**, 2101193.
3. Z. Chen, A. Yu, R. Ahmed, H. Wang, H. Li and Z. Chen, *Electrochim. Acta*, 2012, **69**, 295-300.
4. Y. Liang, Q. Gong, X. Sun, N. Xu, P. Gong and J. Qiao, *Funct. Mater. Lett.*, 2020, **13**, 8.
5. X. Sun, T. Xu, W. Sun, J. Bai and C. Li, *J. Alloys Compd.*, 2022, **898**, 162778.
6. R. Wang, H. Yang, N. Lu, S. Lei, D. Jia, Z. Wang, Z. Liu, X. Wu, H. Zheng, S. Ali, F. Ma and S. Peng, *Chem. Eng. J.*, 2022, **433**, 134500.
7. S. J. Ha, J. Hwang, M. J. Kwak, J. C. Yoon and J. H. Jang, *Small*, 2023, **19**, 2300551.
8. Z. Chen, X. Peng, Z. Chen, T. Li, R. Zou, G. Shi, Y. Huang, P. Cui, J. Yu, Y. Chen, X. Chi, K. P. Loh, Z. Liu, X. Li, L. Zhong and J. Lu, *Adv. Mater*, 2023, **35**, 2209948.
9. Q. Dong, H. Wang, F. Liu, J. Ren, H. Wang, X. Wang and R. Wang, *J. Mater. Chem. A*, 2023, **11**, 4717-4728.
10. P. Weng, Y. Guo, K. Wu, X. Wang, G.-Q. Huang, H. Lei, Y. Yuan, W. Lu and D. Li, *J. Mater. Chem. A*, 2023, **11**, 12194-12201.
11. M. Kumar and T. C. Nagaiah, *J. Mater. Chem. A*, 2023, **11**, 18336-18348.
12. K. Srinivas, H. Yu, Z. Chen, A. Chen, M.-q. Zhu, Y. Chen and C. Yang, *J. Mater. Chem. A*, 2024, **12**, 16863-16876.
13. J.-F. Gu, J. Wang, Q. Wu, C. Wang, F. Verpoort and S. Chaemchuen, *J. Mater. Chem. A*, 2024, **12**, 16528-16536.
